# Supplementary material
Source: Springer Nature journal article supplement (https://www.springermedizin.de/resource/supplementary/12883_2011_564_MOESM2_ESM.pdf/9455404)

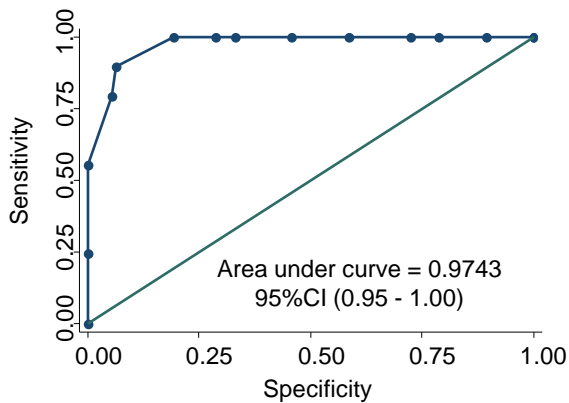

A

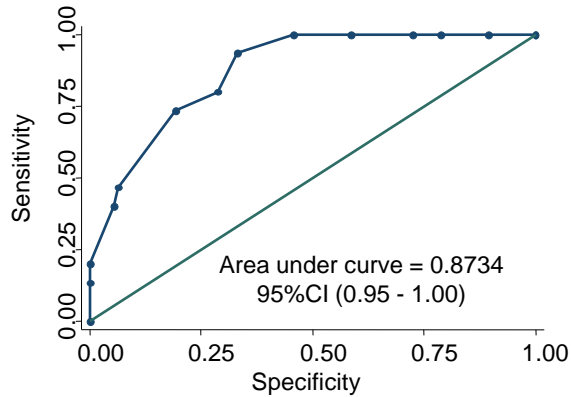

B

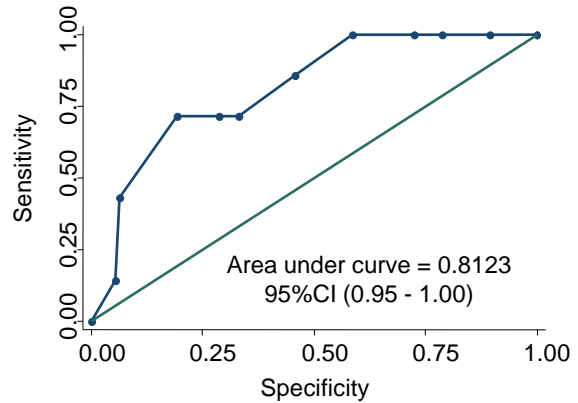

C

Supplement: MOESM2 [file 9455404]
